# Supplementary material for: Inverse modelling of CH 4 emissions for 2010–2011 using different satellite retrieval products from GOSAT and SCIAMACHY
Source: Copernicus journal article supplement (doi:10.5194/acp-15-113-2015), 2015-01-09
Supplement: Supplementary file [file acp-15-113-2015-supplement.pdf]

Supplement of Atmos. Chem. Phys., 15, 113–133, 2015  
<http://www.atmos-chem-phys.net/15/113/2015/>  
doi:10.5194/acp-15-113-2015-supplement  
© Author(s) 2015. CC Attribution 3.0 License.

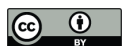

*Supplement of*

## **Inverse modelling of CH<sub>4</sub> emissions for 2010–2011 using different satellite retrieval products from GOSAT and SCIAMACHY**

**M. Alexe et al.**

*Correspondence to:* M. Alexe (mihai.alex@jrc.ec.europa.eu)

Table T1: Statistics of model to observations fit residuals for inversions S2/S3-GOSAT-SRON-FP and S2/S3-GOSAT-UL-PX: NOAA surface measurements (left) and satellite data (right).

| Inversion        | NOAA ground stations |            |           | Satellite |            |           |
|------------------|----------------------|------------|-----------|-----------|------------|-----------|
|                  | n                    | Bias [ppb] | RMS [ppb] | n         | Bias [ppb] | RMS [ppb] |
| S2-GOSAT-SRON-FP | 3418                 | -0.6       | 12.1      | 31201     | -0.1       | 10.4      |
| S3-GOSAT-SRON-FP | 3418                 | 0.3        | 12.0      | 31201     | -0.3       | 10.3      |
| S2-GOSAT-UL-PX   | 3418                 | -0.9       | 12.1      | 129916    | 0.0        | 9.0       |
| S3-GOSAT-UL-PX   | 3418                 | 0.3        | 11.8      | 129916    | -0.1       | 8.8       |

Table T2: NOAA/ESRL stations used in the inversion.

| Station ID | Latitude | Longitude | Altitude [m] | Station Name                                          |
|------------|----------|-----------|--------------|-------------------------------------------------------|
| ALT        | 82.45    | -62.52    | 210.0        | Alert, Nunavut, Canada                                |
| ZEP        | 78.90    | 11.88     | 475.0        | Ny-Alesund, Svalbard (Spitsbergen), Norway and Sweden |
| SUM        | 72.58    | -38.48    | 3238.0       | Summit, Greenland                                     |
| BRW        | 71.32    | -156.60   | 11.0         | Barrow, Alaska, USA                                   |
| ICE        | 63.34    | -20.29    | 127.0        | Heimay, Vestmannaeyjar, Iceland                       |
| CBA        | 55.20    | -162.72   | 25.0         | Cold Bay, Alaska, USA                                 |
| SHM        | 52.72    | 174.10    | 40.0         | Shemya Island, Alaska, USA                            |
| UUM        | 44.45    | 111.10    | 914.0        | Ulaan Uul, Mongolia                                   |
| NWR        | 40.05    | -105.58   | 3526.0       | Niwot Ridge, Colorado, USA                            |
| AZR        | 38.77    | -27.38    | 40.0         | Terceira Island, Azores, Portugal                     |
| WLG        | 36.29    | 100.90    | 3810.0       | Mt. Waliguan, Peoples Republic of China               |
| BMW        | 32.27    | -64.88    | 30.0         | Tudor Hill, Bermuda, UK                               |
| IZO        | 28.30    | -16.48    | 2360.0       | Tenerife, Canary Islands, Spain                       |
| MID        | 28.21    | -177.38   | 7.7          | Sand Island, Midway, USA                              |
| ASK        | 23.18    | 5.42      | 2728.0       | Assekrem, Algeria                                     |
| MLO        | 19.53    | -155.58   | 3397.0       | Mauna Loa, Hawaii, USA                                |
| KUM        | 19.52    | -154.82   | 3.0          | Cape Kumukahi, Hawaii, USA                            |
| GMI        | 13.43    | 144.78    | 6.0          | Mariana Islands, Guam                                 |
| RPB        | 13.17    | -59.43    | 45.0         | Ragged Point, Barbados                                |
| CHR        | 1.70     | -157.17   | 3.0          | Christmas Island, Republic of Kiribati                |
| SEY        | -4.67    | 55.17     | 7.0          | Mahe Island, Seychelles                               |
| ASC        | -7.92    | -14.42    | 54.0         | Ascension Island, UK                                  |
| SMO        | -14.24   | -170.57   | 42.0         | Tutuila, American Samoa, USA                          |
| CGO        | -40.68   | 144.68    | 94.0         | Cape Grim, Tasmania, Australia                        |
| CRZ        | -46.45   | 51.85     | 120.0        | Crozet Island, France                                 |
| TDF        | -54.87   | -68.48    | 20.0         | Tierra Del Fuego, La Redonda Isla, Argentina          |
| PSA        | -64.92   | -64.00    | 10.0         | Palmer Station, Antarctica, USA                       |
| SYO        | -69.00   | 39.58     | 14.0         | Syowa Station, Antarctica, Japan                      |
| HBA        | -75.58   | -26.50    | 33.0         | Halley Station, Antarctica, UK                        |
| SPO        | -89.98   | -24.80    | 2810.0       | South Pole, Antarctica, USA                           |

Table T3: TCCON stations used for validation

| Station ID | Latitude | Longitude | Altitude [m] | Station Name                                          |
|------------|----------|-----------|--------------|-------------------------------------------------------|
| EUR        | 80.05    | -86.42    | 610.0        | Eureka, Canada                                        |
| ZEP        | 78.92    | 11.92     | 20.0         | Ny-Alesund, Svålbard (Spitsbergen), Norway and Sweden |
| SOD        | 67.37    | 26.63     | 180.0        | Sodankyla, Finland                                    |
| BIA        | 53.23    | 23.03     | 160.0        | Bialystok, Poland                                     |
| BRM        | 53.10    | 8.85      | 30.0         | Bremen, Germany                                       |
| KAR        | 49.10    | 8.44      | 110.0        | Karlsruhe, Germany                                    |
| ORL        | 47.97    | 2.11      | 130.0        | Orleans, France                                       |
| GAR        | 47.48    | 11.06     | 750.0        | Garmisch, Germany                                     |
| PAR        | 45.94    | -90.27    | 440.0        | Park Falls, WI, USA                                   |
| INF        | 39.86    | -86.00    | 270.0        | INFLUX, Indianapolis, IN, USA                         |
| FCO        | 36.80    | -108.48   | 1640.0       | Four Corners, NM, USA                                 |
| LAM        | 36.60    | -97.49    | 320.0        | Lamont, OK, USA                                       |
| TS2        | 36.05    | 140.12    | 30.0         | Tsukuba, Japan                                        |
| JP1        | 34.13    | -118.13   | 210.0        | JPL, USA                                              |
| SAG        | 33.24    | 130.29    | 10.0         | Saga, Japan                                           |
| IZO        | 28.30    | -16.48    | 2370.0       | Izaña, Tenerife, Spain                                |
| ASC        | -7.92    | -14.33    | 10.0         | Ascension Island                                      |
| DAR        | -12.43   | 130.89    | 30.0         | Darwin, Australia                                     |
| WGO        | -34.41   | 150.88    | 30.0         | Wollongong, Australia                                 |
| LD2        | -45.05   | 169.68    | 370.0        | Lauder, New Zealand                                   |

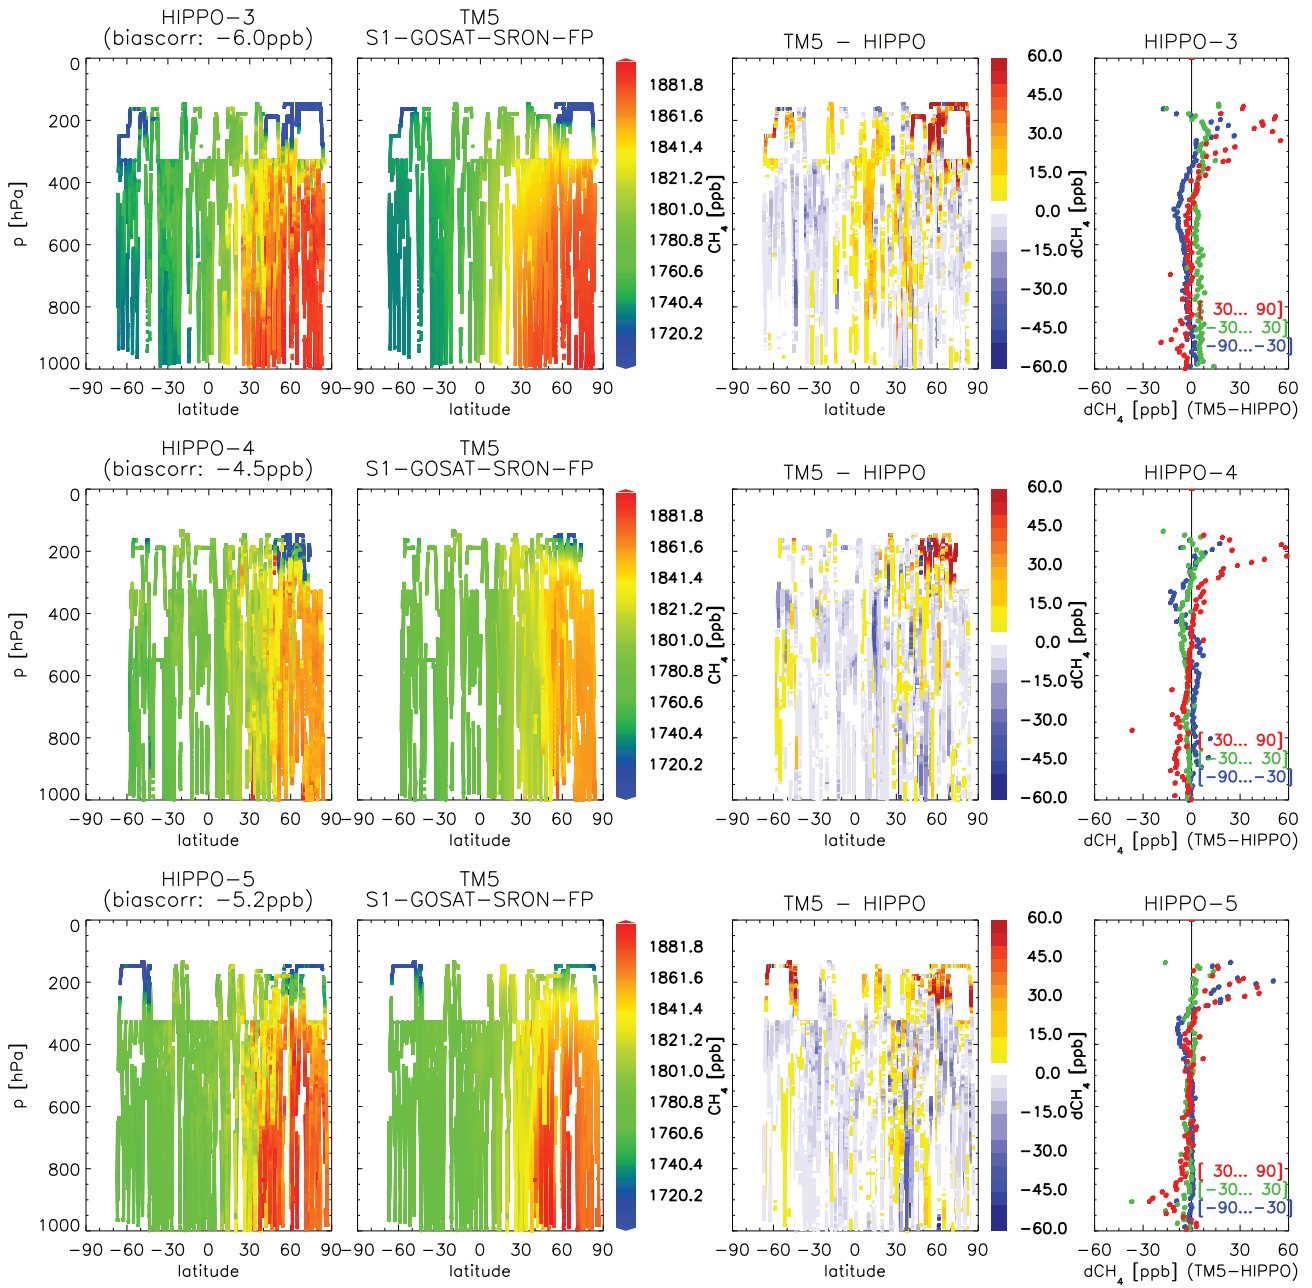

Figure S1: Model validation against HIPPO campaigns 3-5 for S1-GOSAT-SRON-FP. Rightmost plots show the average bias as a function of latitude: extratropical Northern Hemisphere (NH) in red, extratropical SH in blue, and the tropics in green.

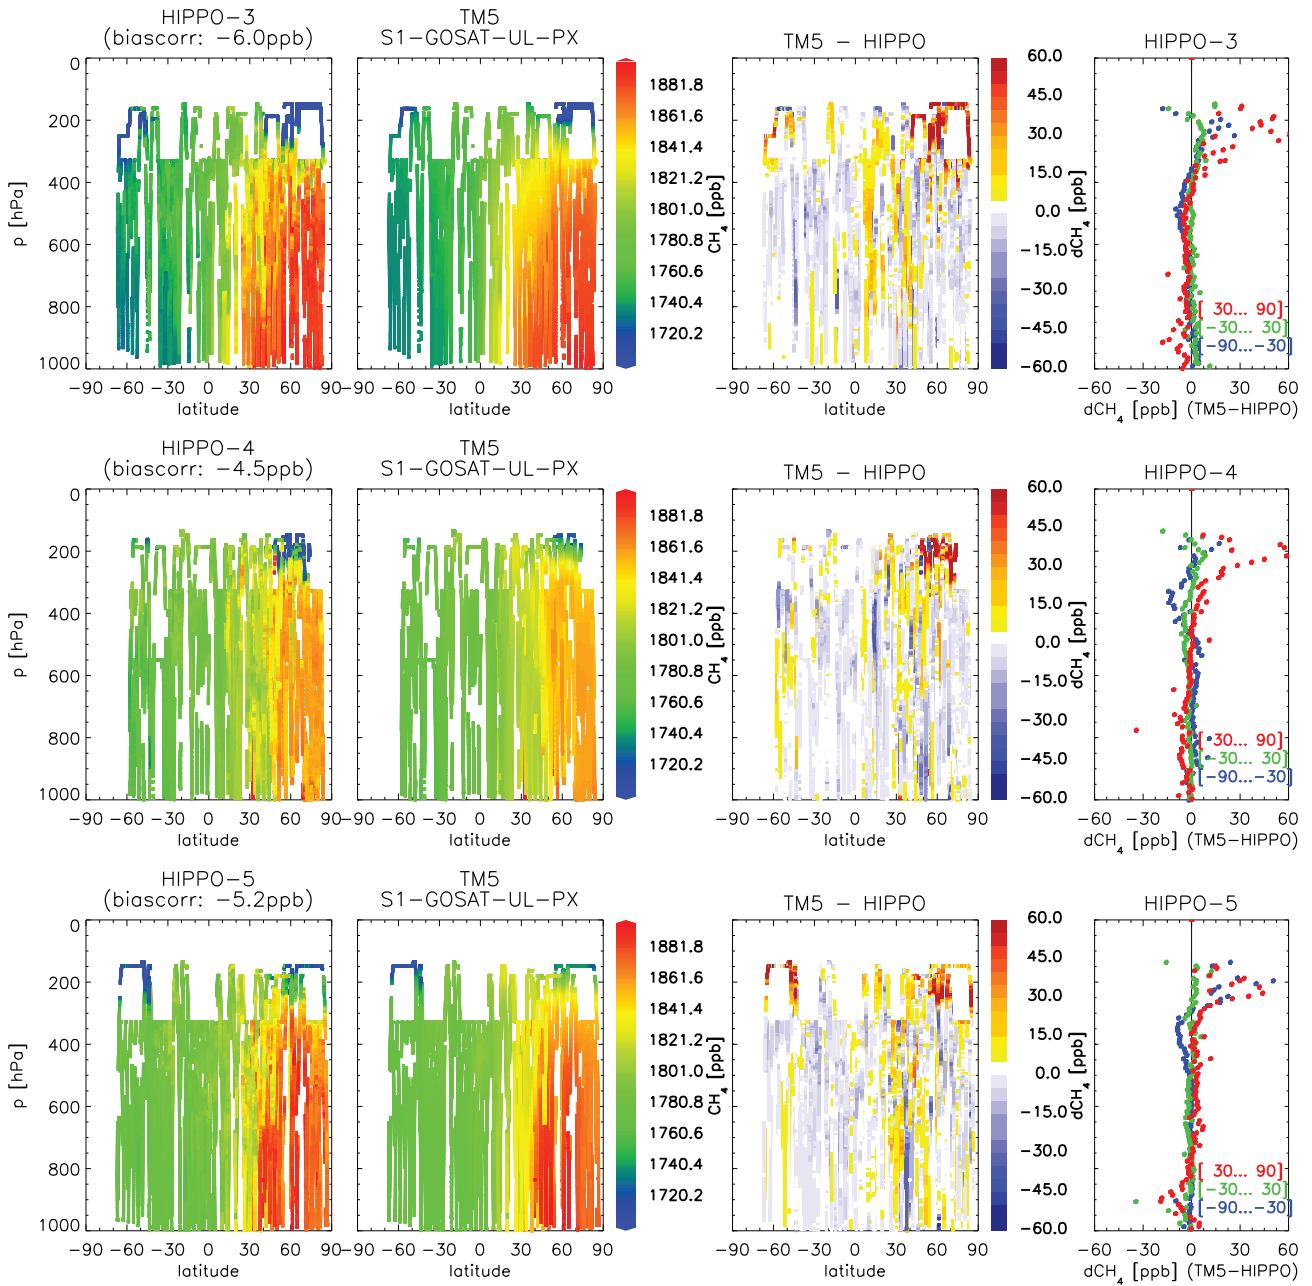

Figure S2: Model validation against HIPPO campaigns 3-5 for S1-GOSAT-UL-PX.

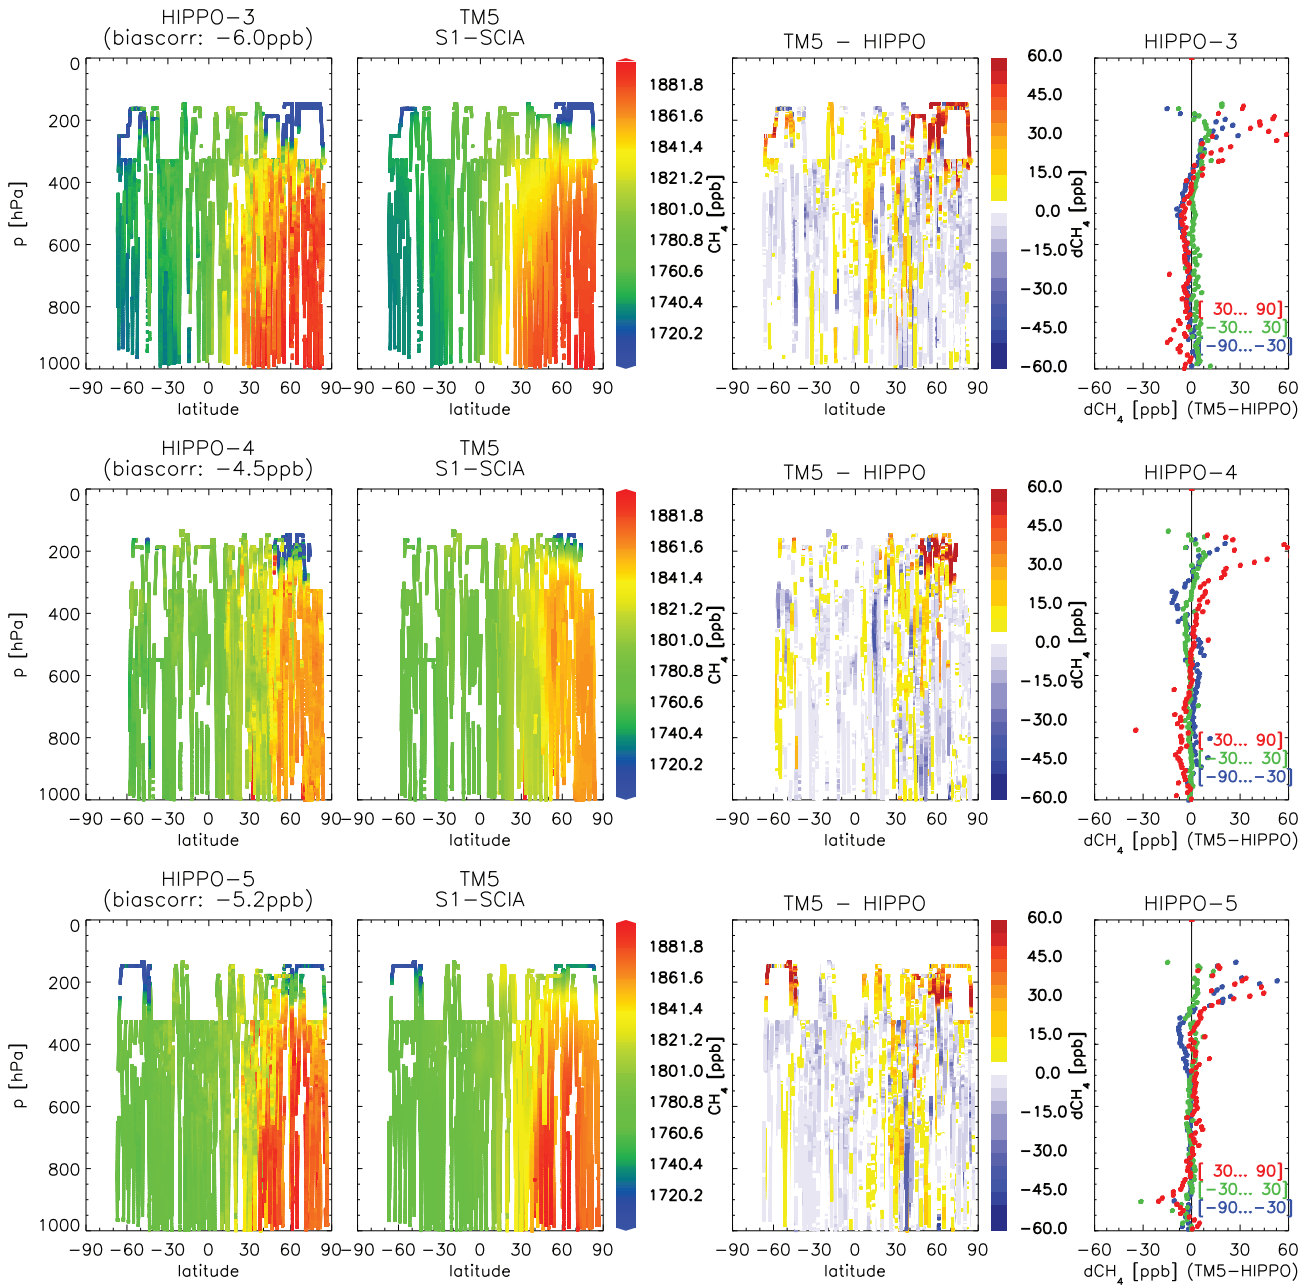

Figure S3: Model validation against HIPPO campaigns 3-5 for S1-SCIA.

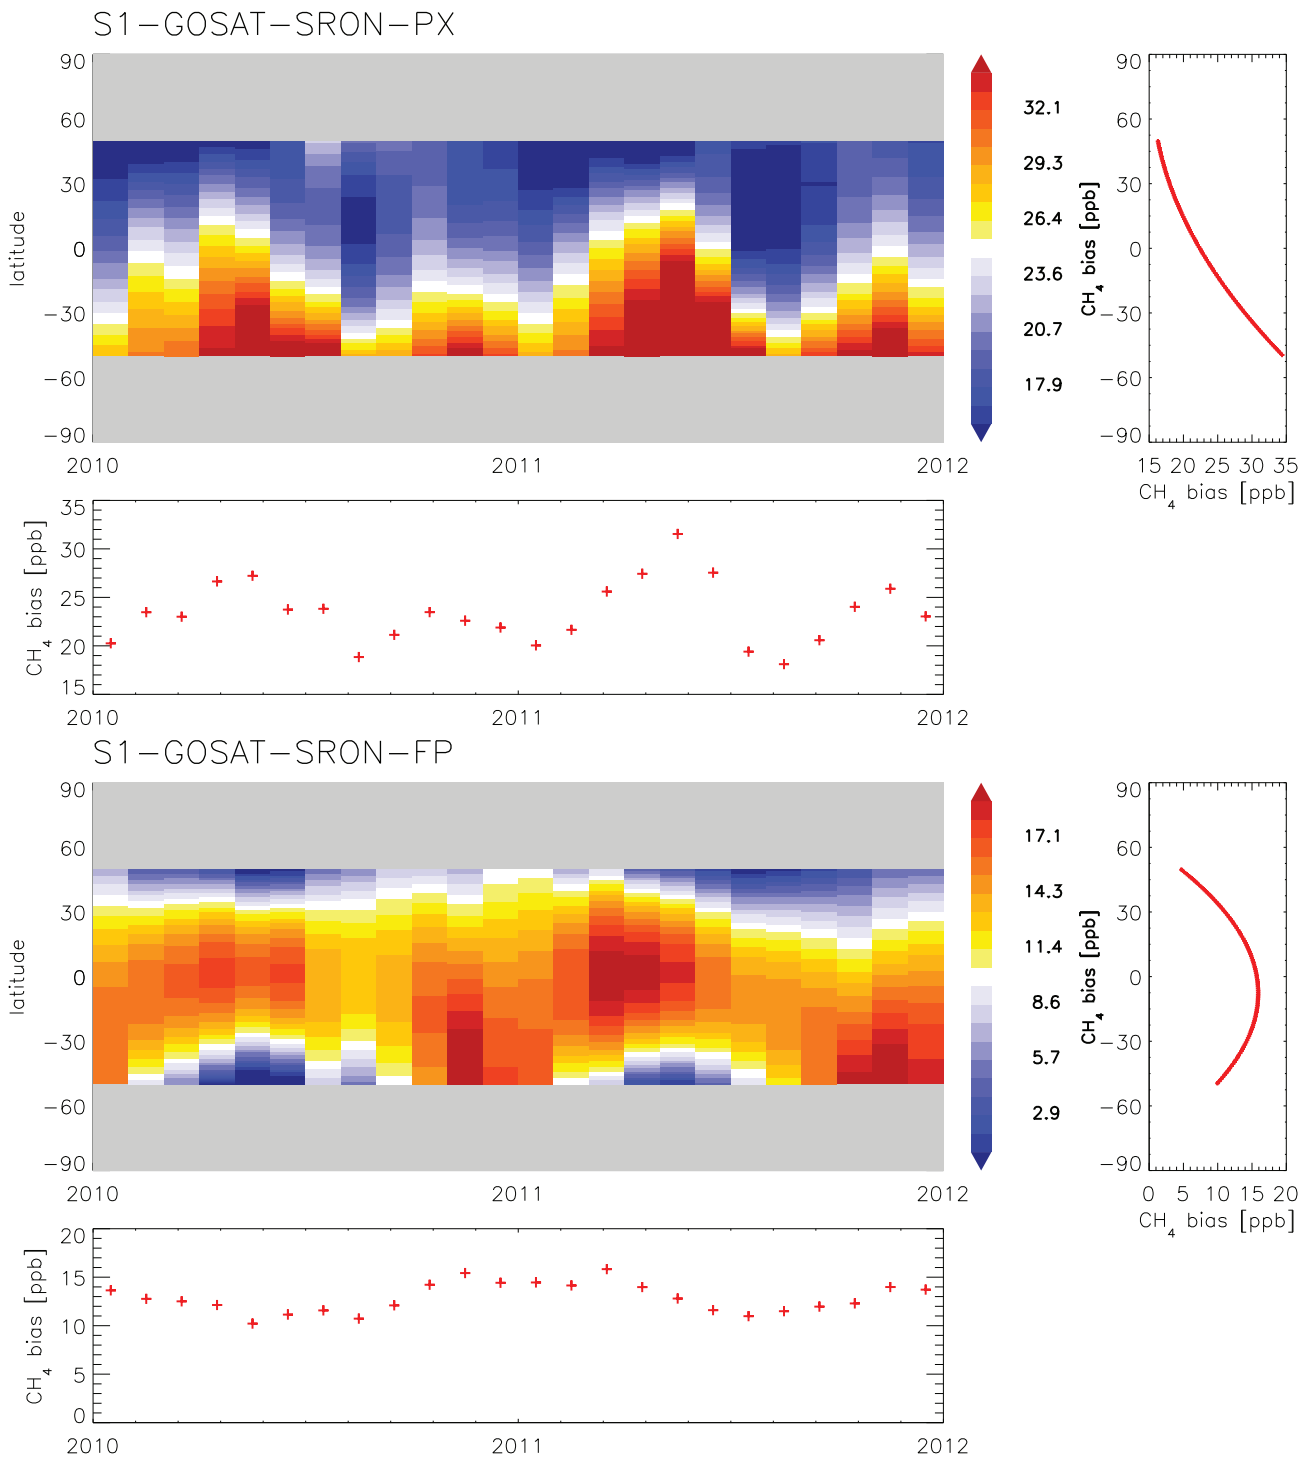

Figure S4: Polynomial bias correction for GOSAT RemoTeC proxy (top) and full-physics XCH<sub>4</sub> retrievals (bottom).

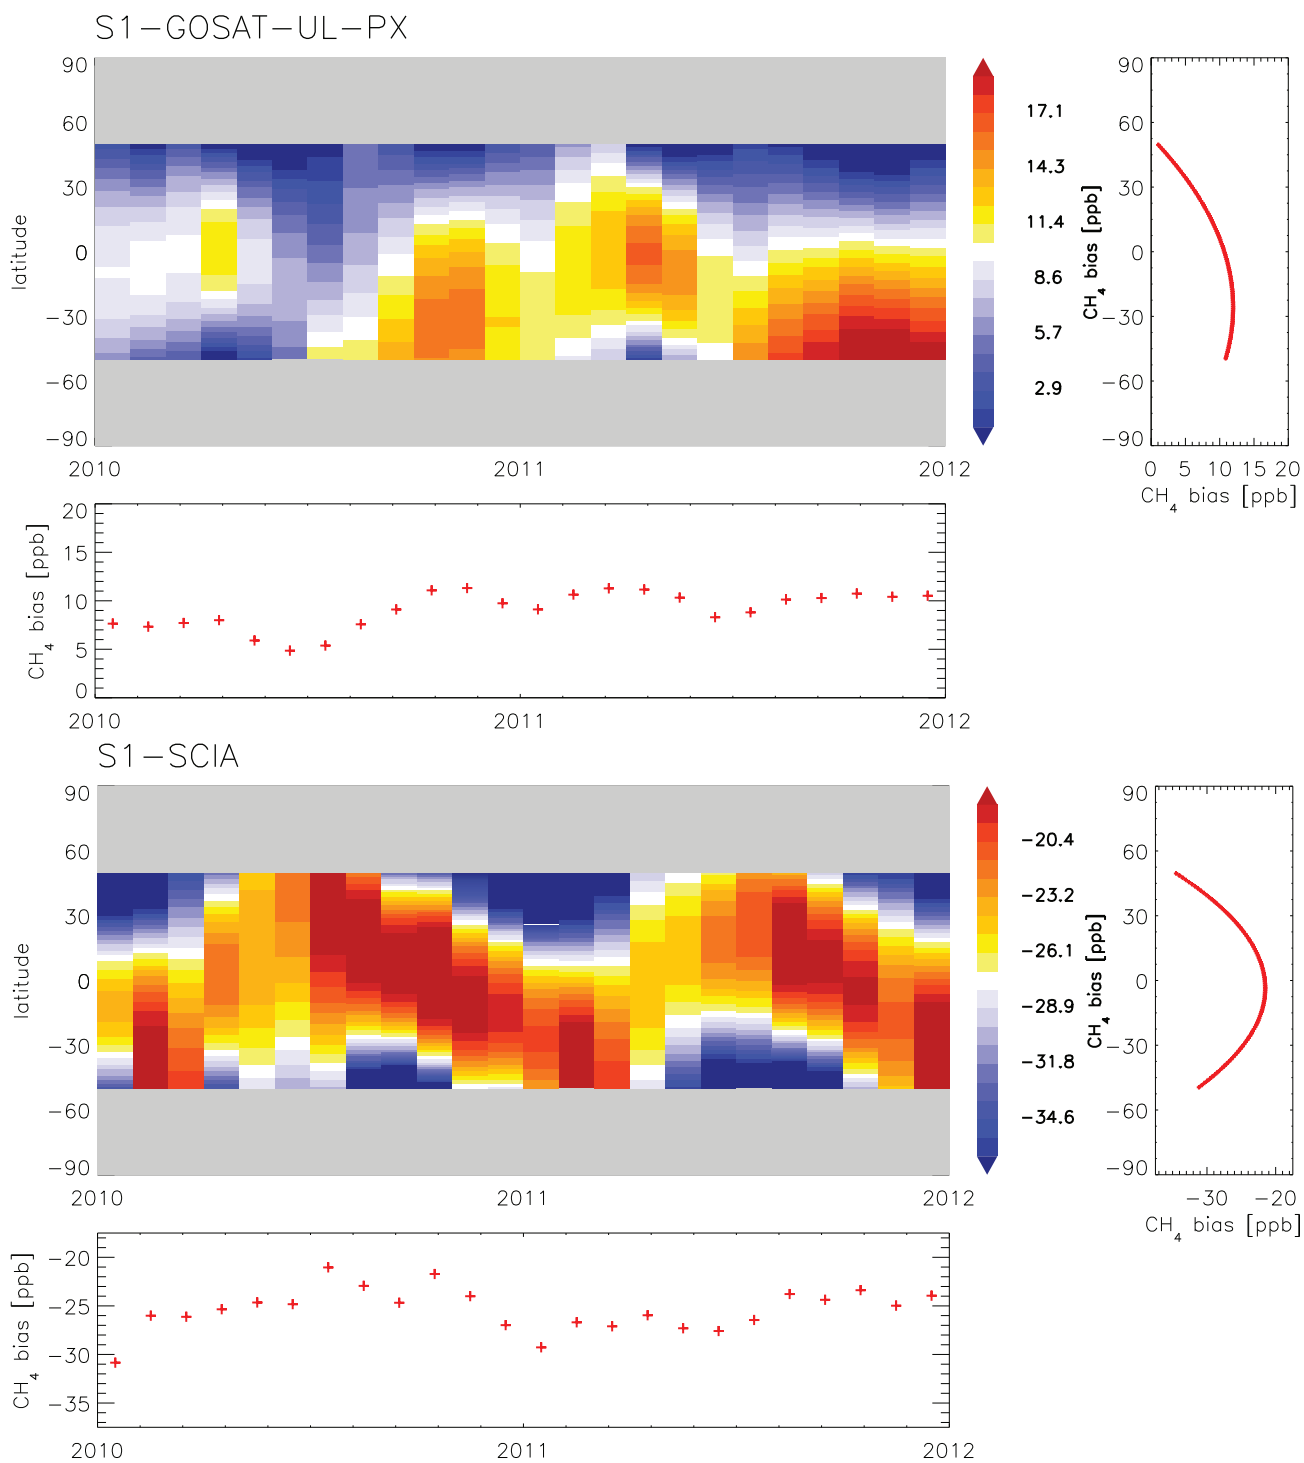

Figure S5: Polynomial bias correction for GOSAT OCPR proxy (top) and SCIAMACHY IMAP XCH<sub>4</sub> retrievals (bottom).
